# Supplementary material for: TDAG8, TRPV1, and ASIC3 involved in establishing hyperalgesic priming in experimental rheumatoid arthritis
Source: PubMed Central journal article supplement (PMC5566336; doi:10.1038/s41598-017-09200-6), 2017-08-21
Supplement: 41598_2017_9200_MOESM1_ESM.pdf [file 41598_2017_9200_MOESM1_ESM.pdf]

# TDAG8, TRPV1, and ASIC3 involved in establishing hyperalgesic priming in experimental rheumatoid arthritis

Wei-Shan Hsieh<sup>1,#</sup>, Chia-Chi Kung<sup>1,2#</sup>, Shir-Ly Huang<sup>3</sup>, Shih-Chang Lin<sup>4</sup> and Wei-Hsin Sun<sup>1\*</sup>

Supplementary data:

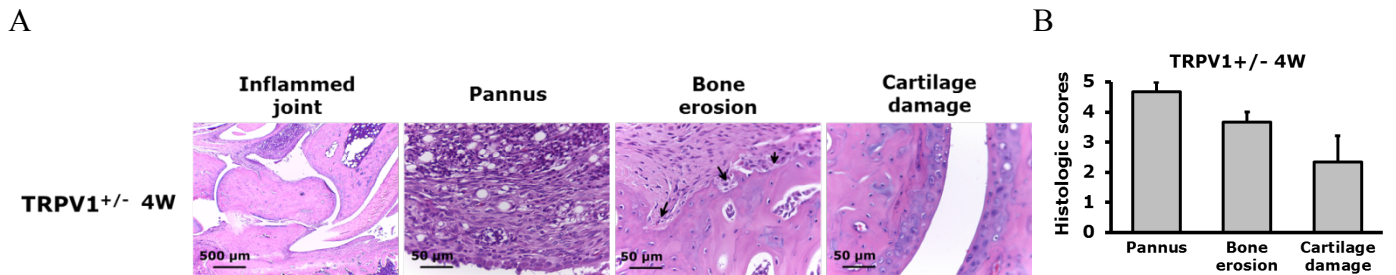

Suppl Fig. 1 **Histology of ipsilateral joint in arthritic TRPV1<sup>+/-</sup> mice.** Samples of ipsilateral TRPV1<sup>+/-</sup> joints at 4 week stained with hematoxylin and eosin. Data are mean±SEM severity score for synovial inflammation, bone erosion, and cartilage damage.

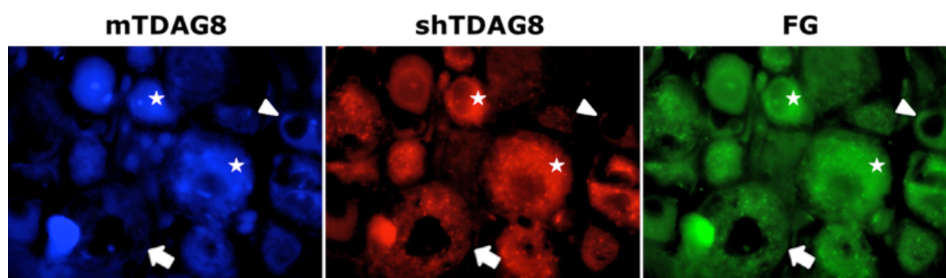

Suppl Fig. 2 **TDAG8 is expressed in joint afferents.** The mouse was intraplantarly injected with shTDAG8 (red fluorescence) and intra-articularly injected with fluorogold (FG, green fluorescence) for 7 days, and mouse was then intra-articularly injected with 5µg CFA. After 1 week, ipsilateral DRG was isolated, sectioned and stained with anti-TDAG8 antibody (blue fluorescence). \* indicates neurons with FG-labeling (FG<sup>+</sup>) and shTDAG8 expression (shTDAG8<sup>+</sup>). Arrowheads indicate FG<sup>+</sup>/ shTDAG8<sup>-</sup> neurons express TDAG8 protein. Arrows indicate FG<sup>+</sup>/ shTDAG8<sup>+</sup> neurons do not express TDAG8 protein.

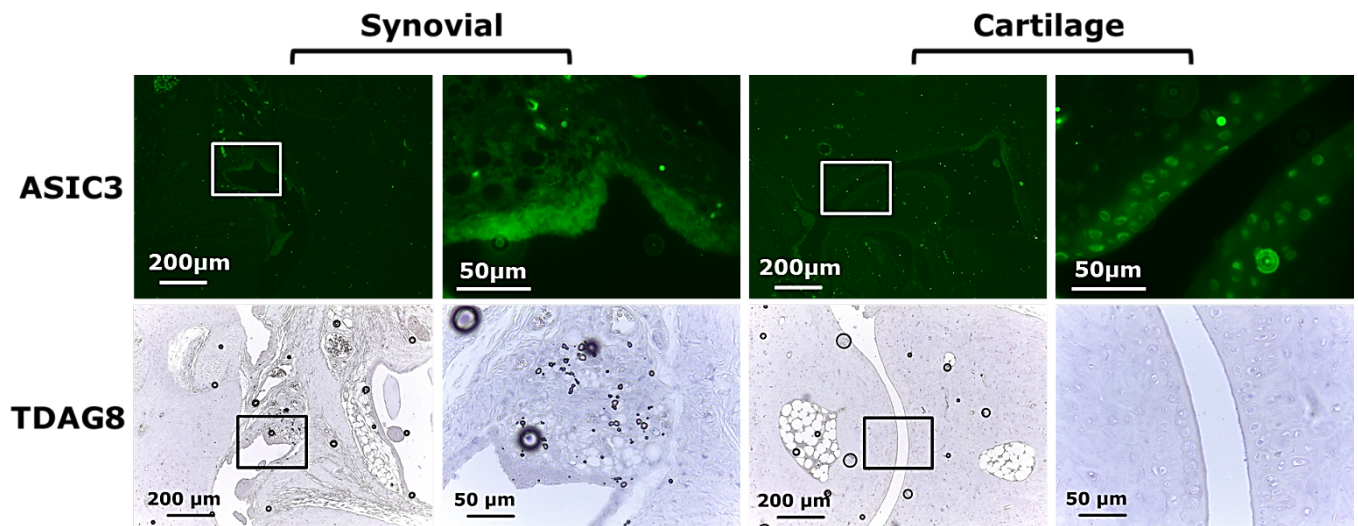

Suppl Fig. 3 **ASIC3 is expressed in synovial sublining and cartilage, but TDAG8 is expressed in synovial sublining.** Samples of joints from WT mice at 12 weeks were stained with anti-ASIC3 or anti-TDAG8 antibodies, followed by FITC- or AP-conjugated secondary antibodies, respectively. Synovial sublining and cartilage was showed. Green fluorescence indicates ASIC3-positive immunoreactivity. Blue dots indicate TDAG8-positive immunoreactivity.
